# Supplementary material
Source: ML conference proceedings conference paper supplement (https://proceedings.mlr.press/v119/srivastava20a.html)
Supplement: Supplementary file [file srivastava20a-supp.pdf]

---

## Supplementary Materials

---

### S1. Derivation of the empirical dual estimator

The arguments given here are a simplification of the class of duality arguments from [Duchi et al. \(2019\)](#). Recall that the inner maximization  $\sup_{h \in \mathcal{H}_L} \mathbb{E}[h(x, c)(\mathbb{E}[\ell(\theta; (x, y)) | x, c] - \eta)]$  admits a plug-in estimator which can be written as a linear objective with Lipschitz smoothness and  $L_2$  norm constraints,

$$\begin{aligned} \max_{h \in \mathbb{R}^n} \quad & \frac{1}{n} \sum_{i=1}^n h_i (\ell(\theta; (x_i, y_i)) - \eta) \\ \text{s.t.} \quad & h_i \geq 0 \text{ for all } i \in [n], \quad \frac{1}{n} \sum_{i=1}^n h_i^2 \leq 1, \\ & h_i - h_j \leq L(\|x_i - x_j\| + \|c_i - c_j\|) \text{ for all } i, j \in [n]. \end{aligned} \tag{1}$$

Now taking the dual with  $\gamma \in \mathbb{R}_+^n$ ,  $\lambda \geq 0$ , and  $B \in \mathbb{R}_+^{n \times n}$ , the associated Lagrangian is

$$\begin{aligned} \mathcal{L}(h, \gamma, \lambda, B) := & \frac{1}{n} \sum_{i=1}^n h_i (\ell(\theta; (x_i, y_i)) - \eta) + \frac{1}{n} \gamma^\top h + \frac{\lambda}{2} \left( 1 - \frac{1}{n} \sum_{i=1}^n h_i^2 \right) \\ & + \frac{1}{n} (L \operatorname{tr}(B^\top D) - h^\top (B \mathbf{1} - B^\top \mathbf{1})) \end{aligned}$$

where  $D \in \mathbb{R}^{n \times n}$  is a matrix with entries  $D_{ij} = \|x_i - x_j\| + \|c_i - c_j\|$ . From strong duality, the primal optimal value (1) is  $\inf_{\gamma \in \mathbb{R}_+^n, \lambda \geq 0, B \in \mathbb{R}_+^{n \times n}} \sup_h \mathcal{L}(h, \gamma, \lambda, B)$ .

The first order conditions for the inner supremum give

$$h_i^* := \frac{1}{\lambda} \left( \ell(\theta; (x_i, y_i)) - \eta + \gamma_i - (B \mathbf{1} - B^\top \mathbf{1})_i \right)_+.$$

Substituting these values and taking the infimum over  $\lambda, \gamma \geq 0$ , we obtain

$$\begin{aligned} \inf_{\lambda \geq 0, \gamma \in \mathbb{R}_+^n} \sup_h \mathcal{L}(h, \gamma, \lambda, B) = & \left( \frac{1}{n} \sum_{i=1}^n \left( \ell(\theta; (x_i, y_i)) - \sum_{j=1}^n (B_{ij} - B_{ji}) - \eta \right)_+^2 \right)^{1/2} \\ & + \frac{L}{n} \sum_{i,j=1}^n (\|x_i - x_j\| + \|c_i - c_j\|) B_{ij}. \end{aligned}$$

Taking the infimum over  $B, \eta$  and substituting this expression into the inner supremum of  $R_L$  gives the desired estimator.

## S2. Distortion Proof

Terminology in this section generally follows that of the main text. We will use  $c$  to describe some true set of unmeasured variables, and  $\bar{c}$  to describe the elicited set. All notation with overhead lines are defined in this space of elicited unmeasured variables (e.g.  $\bar{h}$ ,  $\overline{\mathcal{H}_L}$ ).

Additionally we will define a forward map from true unmeasured variables to elicited ones,  $f : \mathcal{C} \rightarrow \bar{\mathcal{C}}$  and a reverse map from elicited unmeasured variables to true ones  $g : \bar{\mathcal{C}} \rightarrow \mathcal{C}$ .

For convenience, define the following risk functionals for the DRO problem under the true unmeasured variables

$$R_L(\theta) := \inf_{\eta} \sup_{h \in \mathcal{H}_L} \frac{1}{\alpha} \mathbb{E}_{x,y,c} [h(x,c) \ell(x,y) - \eta] + \eta,$$

and under the estimated ones

$$\bar{R}_L(\theta) := \inf_{\eta} \sup_{\bar{h} \in \overline{\mathcal{H}_L}} \frac{1}{\alpha} \mathbb{E}_{x,y,\bar{c}} [\bar{h}(x,\bar{c}) \ell(x,y) - \eta] + \eta. \quad (2)$$

We can define the upper bound for the Lipschitz case,

**Proposition.** *Let  $f : \mathcal{C} \rightarrow \bar{\mathcal{C}}$  define  $\hat{h}(x,c) := \bar{h}(x, f(c))$  such that  $\frac{1}{K_f} \hat{h} \in \mathcal{H}_L$  for all  $\bar{h} \in \overline{\mathcal{H}_L}$ . Then,*

$$\bar{R}_L(\theta) \leq K_f R_L(\theta) + \frac{LM \mathbb{E}_{xy} W_1(f(c|xy), \bar{c}|xy)}{\alpha}$$

where  $f(c|xy)$  is the pushforward measure of  $c|xy$  under  $f$ .

*Proof.* Let  $\bar{h}^*$  be the  $\bar{h} \in \overline{\mathcal{H}_L}$  which is the maximizer to Eq (2). For convenience define

$$\begin{aligned} \Delta_{xy}^f &:= E_{c|xy}[\hat{h}^*(x,c)] - E_{\bar{c}|xy}[\bar{h}^*(x,\bar{c})] \\ &= E_{\bar{c} \sim f(c|xy)}[\bar{h}^*(x,\bar{c})] - E_{\bar{c}|xy}[\bar{h}^*(x,\bar{c})] \end{aligned}$$

The equality follows the change of variables property of pushforward measures. Now rewriting the risk measure in terms of  $\Delta$ ,

$$\begin{aligned} \bar{R}_L(\theta) &= \inf_{\eta} \frac{1}{\alpha} \mathbb{E}_{xy} \left[ \left( E_{c|xy}[\hat{h}^*(x,c)] - \Delta_{xy}^f \right) \ell(x,y) - \eta \right] + \eta \\ &\leq \inf_{\eta} \frac{1}{\alpha} \mathbb{E}_{xy} \left[ E_{c|xy}[\hat{h}^*(x,c)] \ell(x,y) - \eta \right] + \eta \\ &\quad + \frac{E_{xy}[|\Delta_{xy}^f|]M}{\alpha} \\ &\leq \inf_{\eta} K_f \sup_{h \in \mathcal{H}_L} \frac{1}{\alpha} \mathbb{E}_{xy} \left[ E_{c|xy}[h(x,c)] \ell(x,y) - \eta \right] + \eta \\ &\quad + \frac{E_{xy}[|\Delta_{xy}^f|]M}{\alpha} \\ &= K_f R_L(\theta) + \frac{E_{xy}[|\Delta_{xy}^f|]M}{\alpha} \\ &\leq K_f R_L(\theta) + \frac{LMW_1(f(c|xy), \bar{c}|xy)}{\alpha} \end{aligned}$$

First inequality follows from Hölder's inequality, and the fact that  $0 \leq \ell(x,y) \leq M$ . The second one follows from the assertion that  $\frac{1}{K_f} \hat{h} \in \mathcal{H}_L$ , and the last inequality follows from the fact that  $\bar{h}$  is  $L$ -Lipschitz, and utilizing the pushforward measure form of  $\Delta$ .  $\square$

An analogous argument shows the other side of this bound given by,

$$R_L(\theta) \leq K_g \bar{R}_L(\theta) + \frac{LM \mathbb{E}_{XY} W_1(c|xy, g(\bar{c}|xy))}{\alpha}.$$

This shows that our DRO estimator achieves multiplicative error scaling with  $K_f, K_g$  and additive error scaling with the Wasserstein distance between the true and the estimated unmeasured variables.

Our assumptions on  $K_f$  and  $K_g$  are easily fulfilled in the case where there is a single bi-Lipschitz bijection  $f : \mathcal{C} \rightarrow \bar{\mathcal{C}}$ . In this case,  $g = f^{-1}$  and  $K_f = K_g = K$ .

We can interpret this bound as capturing two sources of error: our metric can be inappropriate and our estimates of  $\bar{\mathcal{C}}$  can be inherently noisy. For the first term, note that a map with higher metric distortion (e.g. bi-Lipschitz maps with large constants) results in a looser bound. This is because the Lipschitz function assumption in the original space  $\mathcal{C}$  does not correspond closely to Lipschitz functions in  $\bar{\mathcal{C}}$ .

For the second term, we incur error whenever  $W_1(c|xy, g(\bar{c}|xy))$  is large. The alignment map  $g$  takes our elicited unmeasured variables and approximates the true ones. However, if  $\bar{c}$  does not contain enough information to reconstruct  $c$  then no function  $g$  can exactly map  $\bar{c}$  to  $c$ , and we incur an approximation error that scales as the transport distance between the two.

We can now provide a simple lemma that bounds the quality of the model estimate under the approximation  $\bar{c}$  compared to the minimizer of the exact unmeasured variables  $c$ .

For convenience we will use the following shorthand for the additive error terms,

$$A_f = \frac{LM \mathbb{E}_{XY} W_1(\bar{c}|xy, f(c|xy))}{\alpha}$$

$$A_g = \frac{LM \mathbb{E}_{XY} W_1(c|xy, g(\bar{c}|xy))}{\alpha}.$$

**Corollary.** Let  $\bar{\theta}^* := \arg \min_{\theta} \bar{R}_L(\theta)$ , then

$$R_L(\bar{\theta}^*) - \inf_{\theta} R_L(\theta)$$

$$\leq \inf_{\theta} R_L(\theta) (K_f K_g - 1) + K_g A_f + A_g$$

*Proof.* By Proposition S2, we have both

$$\inf_{\theta} \bar{R}_L(\theta) \leq \inf_{\theta} K_f R_L(\theta) + A_f$$

$$R_L(\bar{\theta}^*) \leq K_g \bar{R}_L(\bar{\theta}^*) + A_g.$$

By definition of  $\bar{\theta}^*$  as the minimizer of  $\bar{R}_L$ , we obtain

$$R_L(\bar{\theta}^*) \leq K_f K_g \inf_{\theta} R_L(\theta) + K_g A_f + A_g$$

which gives the stated result. □

The corollary shows that the best model under the estimated unmeasured variables  $\bar{c}$  performs well under the true DRO risk measure  $R_L$  as long as  $K_f K_g \approx 1$  and  $A_f, A_g$  are small. There are two sources of error: the metric distortion results in a relative error that scales as  $K_f K_g$ , and the noise in estimation ( $A_f, A_g$ ) results in additive error. The  $K_g A_f$  scaling term arises from the fact that error is measured with respect to the metric over  $c$ , not over  $\bar{c}$ .

Importantly, these bounds show that we need not directly estimate the true unmeasured variables  $c$  using  $\bar{c}$  - our estimated unmeasured variables can live in an entirely different space, and as long as there *exists* some low-distortion alignment functions  $f, g$  that align the two spaces, the implied risk functions are similar.

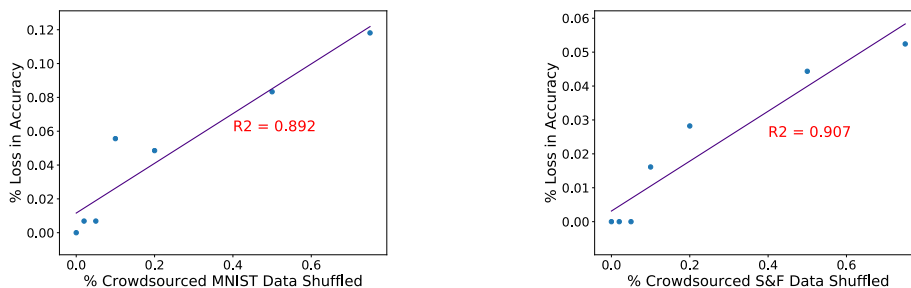

Figure S1. Decreasing crowdsourcing quality by randomly shuffling results in a highly correlated decrease in accuracy over both MNIST (left) and stop-and-frisk(right) datasets.

### S3. Effect of Crowdsourcing Quality

We empirically evaluate the role of crowdsourcing data quality on UV-DRO performance to complement our theoretical bound in Section 4. We previously showed a significant performance gap when we shuffle 100% of the crowdsourced unmeasured variables, causing random associations that impact the crowdsourcing quality. We further investigate this gap by shuffling [0, 2, 5, 10, 20, 50, 75]% of the crowdsourced unmeasured variables, and find a highly correlated accuracy drop for both MNIST ( $R^2 = .89$ ) and stop-and-frisk datasets ( $R^2 = .91$ ), as seen in Figure S1. This demonstrates a linear relationship between crowdsourcing quality and robust performance.

### S4. Annotation Unigrams Analysis Table

Table S1. Exploratory analysis on the annotations collected over stop-and-frisk data by training a logistic regression model to predict location from a selection of annotation unigrams.

| BROOKLYN       |        | MANHATTAN |        |
|----------------|--------|-----------|--------|
| UNIGRAM        | WEIGHT | UNIGRAM   | WEIGHT |
| DISCRIMINATION | -1.22  | WEAPON    | 0.82   |
| RACIST         | -0.29  | GUN       | 0.21   |
| RACIAL         | -0.19  | ARMED     | 0.89   |
| HOMELESS       | -0.84  | DRUG      | 0.43   |
| UNRELATED      | -1.68  | GANG      | 1.03   |
| CLEARED        | -0.98  | DANGEROUS | 0.79   |
| EVIDENCE       | -0.12  | WITNESS   | 0.81   |

### S5. Reproducibility & Experiment Details

All experiments and data described below are available on CodaLab: <https://bit.ly/uvdro-codalab>.

#### S5.1. Simulated Medical Diagnosis Task

We simulate our data ( $n=1,000$ ) using the following generation procedure:

1.  $q_{train} = .05, .1, .2, .3, .4, .5, .6, .7, .8$  and  $q_{test} = 0.8$ .
2.  $c$  is sampled from the  $c \sim 1 - 2 \text{ Bernoulli}(q)$ .
3.  $y$  is sampled from  $y \sim \mathcal{N}(0, 2)$ , independent from from train or test.
4. For each  $(c, y)$  sample, set  $x_1 = c * y$  and  $x_2 = y + \epsilon$  where  $\epsilon \sim \mathcal{N}(0, 4)$ .

For both ERM and UV-DRO, we trained a linear regression model over  $p(y|x_1, x_2)$ , optimized using batch gradient descent

over 3k steps with AdaGrad with an optimal learning rate of .0001. We set UV-DRO parameter  $\alpha = 0.2$ , and tune  $\eta$  via grid-search for each  $q_{train}$  value. We present results (Mean Squared Error) on the same held-out test set for all models.

### S5.2. MNIST Digit Classification with Confounding Transformations

We use the popular MNIST dataset (<http://yann.lecun.com/exdb/mnist/>). We train on only a subset (n=4000) of the training data due to the cost of collecting annotations, and tune parameters on a separate validation set. For all data points, we treat the pixels of a (possibly transformed) image as the features  $x$ , the fact of whether a transformation occurred as the unmeasured variable  $c$ , and the MNIST digit as label  $y$ . We simulate a shift in an unmeasured rotation confounding variable using the following procedure:

1.  $q_{train} = .05, .1, .2, .4, .6$  and  $q_{test} = 1.0$ .
2.  $c$  is sampled from the  $c \sim \text{Bernoulli}(q)$ , where  $c = 1$  means the image was rotated.
3. For each  $(x, y)$  pair in the dataset, we rotate the original MNIST image  $x$  by 180 degrees if  $c = 1$ .

For all ERM, DRO, and UV-DRO models, we trained a logistic regression model, optimized with batch gradient descent using AdaGrad and an optimal learning rate of .001. The optimal  $l_2$  penalty found for ERM models was 25. Optimal UV-DRO parameters (tuned on 20% of data as valid) include  $l_2$  penalty of 50, a Lipschitz constant  $L$  of 1,  $\alpha = 0.2$ , and we explicitly solve for the minimizer of  $\eta$  with regards to the empirical distribution at each gradient step. We present results (Log-Loss, Accuracy) on the same held-out test set for all models.

### S5.3. Police Stop Analysis with Confounding Locations

We use a dataset of NYPD police stops (<https://www.nyclu.org/en/stop-and-frisk-data>). We train on only a subset (n=2000) of the training data due to the cost of collecting annotations, and tune parameters on a separate validation set. For all data points, we filter out all variables except for 26 police stop observation as features  $x$  (i.e. "in a high crime area"), the NYC borough as the unmeasured location variable  $c$ , and the label for arrest  $y$ . We simulate a shift in the location variable ( $c$ ) using the following procedure:

1.  $q_{train} = 0.1, 0.2, 0.3, 0.4, 0.5, 0.6$  and  $q_{test} = 1.0$ .
2.  $c$  is sampled from the  $c \sim \text{Bernoulli}(q)$ , where  $c = 1$  means the location is Brooklyn.
3. We build the dataset by drawing from the entire dataset a  $(x, y, c = c')$  example for each  $c'$  sampled.

For all ERM, DRO, and UV-DRO models, we trained a logistic regression model optimized with batch gradient descent using AdaGrad and an optimal learning rate of .005. The optimal  $l_2$  penalty found for ERM models was 0. Optimal UV-DRO (tuned on 20% of data as valid) parameters include  $l_2$  penalty of 50, a Lipschitz constant  $L$  of 1,  $\alpha = 0.2$ , and we explicitly solve for the minimizer of  $\eta$  with regards to the empirical distribution at each gradient step. We present results (Log-Loss, Accuracy) on the same held-out test set for all models.

## References

Duchi, J., Hashimoto, T., and Namkoong, H. Distributionally robust losses against mixture covariate shifts. <https://cs.stanford.edu/~thashim/assets/publications/condrisk.pdf>, 2019.
